1 **Title: Cortical selectivity driven by connectivity: Innate**  
2 **connectivity patterns of the visual word form area**

3

4 Authors: Jin Li\*, David E. Osher, Heather A. Hansen, Zeynep M. Saygin\*

5 **Affiliation:** Department of Psychology & Center for Cognitive and Brain Sciences, The  
6 Ohio State University, Columbus, OH

7

8 Please address correspondence to:

9 Jin Li, Department of Psychology, The Ohio State University, 273 Psychology Building,  
10 1835 Neil Avenue, Columbus, OH, 43210. E-mail: [li.9361@osu.edu](mailto:li.9361@osu.edu)

11 and

12 Zeynep M. Saygin, Department of Psychology, The Ohio State University, 205  
13 Psychology Building, 1835 Neil Avenue, Columbus, OH, 43210. E-mail:  
14 [saygin.3@osu.edu](mailto:saygin.3@osu.edu)

15

16

17

18

19

## Abstract

20 What determines the functional organization of cortex? One hypothesis is that innate  
21 connectivity patterns set up a scaffold upon which functional specialization can later  
22 take place. We tested this hypothesis by asking whether the visual word form area  
23 (VWFA), an experience-driven region, was already connected to proto language  
24 networks in neonates scanned within one week of birth. With resting-state fMRI, we  
25 found that neonates showed adult-like functional connectivity, and observed that i)  
26 language regions connected more strongly with the putative VWFA than other adjacent  
27 ventral visual regions that also show foveal bias, and ii) the VWFA connected more  
28 strongly with frontotemporal language regions than with regions adjacent to these  
29 language regions. These data suggest that the location of the VWFA is earmarked at  
30 birth due to its connectivity with the language network, providing evidence that innate  
31 connectivity instructs the later refinement of cortex.

## 32 INTRODUCTION

33 Decades of research suggest that the adult brain is composed of patches of cortex that  
34 are specialized for unique mental functions. To what extent is the functional  
35 organization of the human brain innate? Recent advances in developmental  
36 neuroimaging have made it possible to start to answer this question. For example, a  
37 previous study showed category-selective responses in high-level visual cortex for faces  
38 and scenes in infants<sup>1</sup>. Further, research in congenitally blind individuals suggests that  
39 cortical selectivity for high-level visual categories may not require visual experience<sup>2</sup>. In  
40 addition to the early emergence of visual processing, a previous study also found a  
41 neural precursor of language processing in infants<sup>3</sup>. Specifically, they found brain  
42 activity in left superior temporal and angular gyri to human speech in 3-month-old  
43 infants. These studies support the protomap hypothesis, which suggests that early  
44 genetic instructions give rise to the mature functional areas of cortex. However, the  
45 mechanisms that drive this early functional specialization remains ambiguous.

46 One possibility is that in the case of visual areas, pre-existing retinotopic biases may  
47 predispose a region to become selective to foveal or peripheral stimuli  
48 (Retinotopic/Eccentricity Hypothesis)<sup>4-8</sup>. However, this hypothesis is unlikely to fully  
49 explain the dissociation between face and word representations in visual cortex; faces  
50 and words are both foveal stimuli<sup>8-10</sup> but are represented in different cortical areas. The  
51 Connectivity Hypothesis (which is not mutually exclusive from the Retinotopic  
52 Hypothesis) proposes that the specialization of a given brain region is largely shaped by  
53 how it connects and communicates with the rest of the brain. Previous work showed  
54 that structural connectivity (via diffusion imaging) as well as functional connectivity (via

55 resting-state scans) can predict task-based selectivity across the brain<sup>11, 12</sup>. Further,  
56 Barttfeld et al. (2018) found a lateral-to-mesial organization in ventral visual cortex in  
57 newborns, suggesting that functional connectivity present at birth may constrain the  
58 subsequent functional specialization of visual areas<sup>13</sup>. This work suggests that  
59 connectivity is tightly intertwined with functional selectivity, and that perhaps early  
60 connectivity patterns may earmark the location of functionally selective cortices. Can the  
61 visual word form area (VWFA), which responds strongly to visual words or letter strings  
62 in literate individuals<sup>14, 15</sup> be differentiated from the adjacent fusiform face area (FFA) by  
63 its connections to high-level cortex like the frontotemporal language network?

64 In adults, the VWFA connects with perisylvian language cortex, differentiating it from  
65 adjacent visual cortex<sup>16</sup>; other studies also found that white matter fibers that originated  
66 from the VWFA pass through fascicles that may be critical for language processing<sup>17, 18</sup>.  
67 In children, a longitudinal study found that connectivity patterns in pre-literate 5-year-  
68 olds predicted the location of the VWFA in each child at age 8 after they learned to  
69 read, and differentiated it from the adjacent FFA<sup>19</sup>. The connectivity patterns that  
70 predicted the VWFA included putative language areas, suggesting that connectivity to  
71 these regions may earmark the future location of the VWFA, and also set up a scaffold  
72 upon which future functional specialization can take place. However, while the 5-year-  
73 olds could not read (and at that age, lacked neural selectivity to letters or letter-like  
74 stimuli), they still would have had years of visual experience with letters and words. Is  
75 the putative VWFA already connected differently and set up to be differentiated from  
76 adjacent visual regions, even at birth with no visual experience with words and little  
77 visual experience at all?

78 Here, we tested this proto-organization of the VWFA in the newborn brain. Based on  
79 the Connectivity Hypothesis, we hypothesized that although the VWFA is highly  
80 experience-dependent, it is already ‘prewired’ to be selective for visual words by  
81 communicating with proto language regions at birth. By examining neonates who were  
82 scanned within one week of birth, we asked i) Do language regions show stronger  
83 functional connectivity (FC) with the putative VWFA than with other high-level visual  
84 areas like face, scene, and object areas? and ii) Does the VWFA show stronger FC with  
85 language regions than with adjacent frontotemporal regions like the multiple-demand  
86 (MD) network, speech regions, and primary auditory cortex (A1)?

87  
88

## 89 **RESULTS**

90 We examined whether the putative VWFA showed privileged connections with language  
91 regions even at birth. Because neonates cannot participate in task-based fMRI  
92 experiments, and because they do not yet have a VWFA, we overlaid functional parcels  
93 from previous studies and atlases<sup>19-22</sup> to the neonates and adults in this study (see  
94 Online Methods for details). As an empirical check, we applied these parcels to an  
95 independent group of adults who performed the fMRI localizer tasks for all of the mental  
96 domains examined in the present study (see Supplementary Results 1&2 and  
97 Supplementary Figures 1&2). We successfully identified subject-specific functional  
98 regions (fROIs) within these parcels; these fROIs demonstrated functionally selective  
99 responses for the conditions of interest in independent fMRI runs (Supplementary  
100 Results 1&2 and Supplementary Figure 1&2). These results support the functional

101 relevance and specificity of these parcels and the spatial variability of functional  
102 specialization across subjects which is captured by these parcels.

103 Note that all the analyses were performed on the volume and voxel-wise results  
104 were projected to the surface for a more comprehensive visual presentation of data.

105

## 106 **The selectivity of VWFA-language connections compared with other visual areas**

107 First, we asked: do language regions selectively connect to the expected site of the  
108 VWFA, compared with other adjacent high-level visual regions? We compared the  
109 functional connectivity (FC) of language regions to the VWFA vs. to other high-level  
110 visual areas in the ventral stream, specifically in regions in the vicinity of the VWFA,  
111 including face selective regions (Fusiform Face Area, FFA; Occipital Face Area, OFA),  
112 scene selective region (Parahippocampal Place Area; PPA), and object selective  
113 regions (Lateral Occipital, LO; Posterior Fusiform Sulcus, PFS) (Fig. 1).

114 Fig. 1 | FC between language regions (seed) and high-level visual regions (targets).

115

116 We first performed a complete 2-way mixed design ANOVA with age group  
117 (neonate, adult) as the between-group variable and target (VWFA, faces, scenes,  
118 objects) as the within-group variable. We found significant main effects for both target  
119 and age group (target,  $F(3,312) = 24.47$ ,  $p < 0.001$ , partial  $\eta^2 = 0.19$ , 95% CI of partial  
120  $\eta^2 = [0.11, 0.26]$ ; age group,  $F(1,312) = 14.07$ ,  $p = 0.002$ , partial  $\eta^2 = 0.04$ , 95% CI of  
121 partial  $\eta^2 = [0.01, 0.09]$ ; and a significant interaction ( $F(3,312) = 4.92$ ,  $p = 0.002$ , partial  
122  $\eta^2 = 0.05$ , 95% CI of partial  $\eta^2 = [0.01, 0.09]$ ). Similar results were observed after

123 accounting for size (Supplementary Results 3). *Post-hoc t*-tests revealed that in adults,  
124 language regions showed significantly higher FC with the VWFA than they did with  
125 faces ( $t(39) = 7.58, p < 0.001$ ), Cohen's  $d = 1.20$ , corrected; 95% CI = [0.11, 0.19]),  
126 scenes ( $t(39) = 9.39, p < 0.001$ , Cohen's  $d = 1.49$ , corrected; 95% CI = [0.16, 0.25]) and  
127 objects ( $t(39) = 7.84, p < 0.001$ , Cohen's  $d = 1.24$ , correct; 95% CI = [0.09, 0.16]) (Fig.  
128 1b). The neonates showed a similar pattern, where connectivity between language  
129 regions and the VWFA was significantly higher than connectivity of language regions to  
130 face ( $t(39) = 6.28, p < 0.001$ , Cohen's  $d = 0.99$ , corrected; 95% CI = [0.09, 0.18]) and  
131 scene ( $t(78) = 3.90, p < 0.001$ , Cohen's  $d = 0.62$ , corrected, 95% CI = [0.04, 0.14])  
132 regions, but we found no statistically significant evidence for a difference between  
133 language regions' connectivity to the VWFA vs. object regions in neonates ( $t(39) = 0.55$ ,  
134  $p = 0.59$ , Cohen's  $d = 0.09$ ; 95% CI = [-0.03, 0.06]) (Fig. 1a). The same results were  
135 found when we intersected the functional parcels used here with meta-analysis maps  
136 generated from Neurosynth (<https://neurosynth.org/>; see Supplementary Results 5 and  
137 Supplementary Figure 6), suggesting that the results are largely applicable to other  
138 ways of defining functional brain regions and with narrower definitions of the functional  
139 parcels.

140 An exploratory analysis revealed that the VWFA was more connected than object  
141 regions to the more canonical aspects of the language network, the language parcel  
142 that likely encompasses Broca's and the language parcel that like encompasses  
143 Wernicke's areas (Online Methods) in neonates as well as in adults (neonates: Broca:  
144  $t(39) = 3.06, p = 0.004$ , Cohen's  $d = 0.48$ , corrected; 95% CI = [0.03, 0.15]; Wernicke:  
145  $t(39) = 3.23, p = 0.003$ , Cohen's  $d = 0.51$ , corrected; 95% CI = [0.04, 0.16]; adults:

146 Broca:  $t(39) = 7.21$ ,  $p < 0.001$ , Cohen's  $d = 1.14$ , corrected; 95% CI = [0.21, 0.38];

147 Wernicke:  $t(39) = 3.13$ ,  $p = 0.003$ , Cohen's  $d = 0.50$ , corrected; 95% CI = [0.03, 0.15]).

148 To further compare connectivity patterns between groups, we next looked at the  
149 connectivity fingerprints of language regions to visual cortex in neonates and adults  
150 (Fig.1b). Here we plot the relative connectivity of language regions to each of the four  
151 target categories (VWFA, face, scene, object regions) as compared to the mean of all  
152 four categories. We found that neonates had a very similar shape of the connectivity  
153 fingerprints as adults, suggesting similar FC patterns between groups. We statistically  
154 quantify the similarity of FC patterns between adults and neonates using Euclidean  
155 distance (as a measure of similarity) of the 4-dimensional FC pattern between  
156 participants. No statistically significant evidence for a difference between the within-  
157 group similarity and between-group similarity was found (within-adults vs. within  
158 neonates:  $t(78) = -0.72$ ,  $p = 0.47$ , Cohen's  $d = 0.16$ ; 95% CI = [-0.07, 0.03]; within-adults  
159 vs. neonates-adults:  $t(78) = -1.68$ ,  $p = 0.10$ , Cohen's  $d = 0.38$ ; 95% CI = [-0.11, 0.01];  
160 within-neonates vs. neonates-adults:  $t(78) = -0.85$ ,  $p = 0.40$ , Cohen's  $d = 0.19$ ; 95% CI  
161 = [-0.10, 0.04]) (Fig.1c; see Online Methods for more details).

162 These results indicate that neonates show an overall similar FC pattern as adults,  
163 with the highest connectivity between language regions and the VWFA. Interestingly,  
164 neonates show similar connectivity between language-VWFA and language-object  
165 regions for the language network as a whole, but show dissociations in VWFA vs. object  
166 connectivity to the more canonical aspects of the language network, suggesting that



167 further developmental refinement of connectivity does occur, especially to specific  
168 aspects of the language circuit.

### 169 **Functional connectivity at a voxelwise level in ventral temporal cortex**

170 Next, we applied a voxelwise approach to analyze the functional connectivity profiles  
171 of language regions at a more fine-grain level. This analysis allowed us to examine  
172 spatial specificity of language-VWFA connectivity, which would serve as a complement  
173 to the parcel-wise analyses. We used language regions as the seed and we looked  
174 within ventral temporal cortex (VTC) for voxels that connected most with these language  
175 regions. Fig. 2a shows the connectivity of VTC voxels to language regions in  
176 representative neonates and adults. Consistent with the previous parcel-wise analysis,  
177 the voxels that have highest connectivity to language regions were mostly located in the  
178 lateral portion of VTC, which is within the putative VWFA location. To quantitatively  
179 identify which functional regions these voxels belonged to, we parametrically increased  
180 the connectivity threshold from the median to the top 95<sup>th</sup> percentile of FC across VTC,  
181 and calculated the number of voxels within the VTC that were connected to language  
182 regions; we then quantified how many of these voxels belonged in each functional  
183 region using Dice coefficient (Online Methods). We found that voxels that were  
184 connected to language regions were always located in the expected VWFA, vs. all other  
185 functional regions in the vicinity; this result was significant for all thresholds (Fig. 2b).

186 Overall, the parcel-based and voxelwise results indicate that the cortical tissue that  
187 may later develop sensitivity to visual words has connectivity patterns that are relatively  
188 adult-like in the neonatal brain, suggesting that it may be earmarked for function due to

189 its preferential connectivity with language regions at birth. However, we also found  
190 differences between neonates and adults, especially with respect to object cortex,  
191 suggesting that there exist changes in this connectivity scaffold that likely result due to  
192 experience with literacy.

193 Fig. 2 | Voxel-wise analyses within the ventral temporal cortex (VTC) using language  
194 regions as the seed.

195

### 196 **Functional connectivity between the putative VWFA and language regions**

197 Next, we asked, does the VWFA connect more to language regions vs. regions in  
198 the vicinity of language areas? We calculated FC between the VWFA (seed region) and  
199 the language, MD, speech, and A1 regions (target regions) (Fig. 3). We first performed  
200 a complete 2-way mixed design ANOVA with age group (neonate, adult) as the  
201 between-group variable and target (language, MD, speech, A1) as the within-group  
202 variable to examine VWFA's connectivity. We found both that main effect of age and  
203 target were significant (age,  $F(1,312) = 9.29$ ,  $p = 0.002$ , partial  $\eta^2 = 0.03$ , 95% CI of  
204 partial  $\eta^2 = [0, 0.07]$ ; target,  $F(3,312) = 24.45$ ,  $p < 0.001$ , partial  $\eta^2 = 0.19$ , 95% CI of  
205 partial  $\eta^2 = [0.11, 0.26]$ ), and the interaction was also significant ( $F(3,312) = 3.90$ ,  $p =$   
206  $0.009$ , partial  $\eta^2 = 0.04$ , 95% CI of partial  $\eta^2 = [0, 0.08]$ ). Similar results were observed  
207 after accounting for size (Supplementary Results 3). Post-hoc t-tests revealed that in  
208 both adults and neonates the putative VWFA was more connected with language  
209 regions than with the other regions (Adults, MD:  $t(39) = 5.72$ ,  $p < 0.001$ , Cohen's  $d =$   
210  $0.90$ , corrected; 95% CI =  $[0.10, 0.21]$ ; Speech:  $t(39) = 6.48$ ,  $p < 0.001$ , Cohen's  $d =$

211 1.02, corrected; 95% CI = [0.14, 0.26]; A1:  $t(39) = 9.32$ ,  $p < 0.001$ , Cohen's  $d = 1.47$ ,  
212 corrected; 95% CI = [0.23, 0.36]; Neonates, MD:  $t(39) = 8.47$ ,  $p < 0.001$ , Cohen's  $d =$   
213 1.34, corrected; 95% CI = [0.11, 0.18]; Speech:  $t(39) = 4.79$ ,  $p = 0.028$ , Cohen's  $d =$   
214 0.76, corrected; 95% CI = [0.06, 0.14]; A1:  $t(78) = 5.63$ ,  $p < 0.001$ , Cohen's  $d = 0.89$ ,  
215 corrected; 95% CI = [0.09, 0.19]) (Fig. 3a).

216 To further compare FC patterns between groups, we next plotted the connectivity  
217 fingerprint of the VWFA in neonates and adults, and observed similar fingerprint shapes  
218 between the two groups (Fig. 3b). Quantitative analyses of the similarity of FC profiles  
219 also confirmed this observation: no statistically significant evidence for a difference  
220 between the within-group similarity and between-group similarity was found (within-  
221 adults vs. within neonates:  $t(78) = -0.55$ ,  $p = 0.58$ , Cohen's  $d = 0.12$ ; 95% CI = [-0.08,  
222 0.05]; within-adults vs. neonates-adults:  $t(78) = -1.29$ ,  $p = 0.20$ , Cohen's  $d = 0.29$ ; 95% CI  
223 = [-0.11, 0.02]; within-neonates vs. neonates-adults:  $t(78) = -0.66$ ,  $p = 0.51$ , Cohen's  $d =$   
224 0.15; 95% CI = [-0.11, 0.05]) (Fig. 3c; see Online Methods for details).

225 To control for potential distance confounds and to further hone in on more spatially  
226 specific FC, we split up the target regions into frontal and temporal cortices and  
227 examined VWFA connectivity to language regions vs. adjacent functional regions in  
228 frontal and temporal cortex separately via planned t-tests. In both adults and neonates,  
229 the VWFA showed significantly higher FC to temporal language regions than adjacent  
230 speech (adults:  $t(39) = 5.48$ ,  $p < 0.001$ , Cohen's  $d = 0.87$ , corrected; 95% CI = [0.09,  
231 0.20]; neonates:  $t(39) = 6.22$ ,  $p < 0.001$ , Cohen's  $d = 0.98$ , corrected; 95% CI = [0.08,  
232 0.16]) and A1 (adults:  $t(39) = 7.16$ ,  $p < 0.001$ , Cohen's  $d = 1.13$ , corrected; 95% CI =

233 [0.17, 0.31]; neonates:  $t(39) = 6.01$ ,  $p < 0.001$ , Cohen's  $d = 0.95$ , corrected; 95% CI =  
234 [0.11, 0.22]) (Supplementary Figure 3a). Next, we compared the VWFA's connectivity to  
235 frontal language regions vs. adjacent multiple-demand (MD) regions. In both adults and  
236 neonates, the VWFA showed significantly higher FC to frontal language regions as  
237 compared to adjacent MD regions (adults:  $t(39) = 9.71$ ,  $p < 0.001$ , Cohen's  $d = 1.54$ ,  
238 corrected; 95% CI = [0.23, 0.35]; neonates:  $t(39) = 4.51$ ,  $p < 0.001$ , Cohen's  $d = 0.71$ ,  
239 corrected; 95% CI = [0.05, 0.13]) (Supplementary Figure 3b). The same results were  
240 found with Neurosynth-overlapped regions (Supplementary Figure 6).

241 Altogether, these results are consistent with previous adult studies by showing that  
242 the VWFA has higher FC to language related regions than to adjacent regions; here we  
243 also find that the neonatal VWFA has similar patterns of FC to language regions as the  
244 adult VWFA.

245 Fig. 3 | FC between VWFA (seed) and non-visual regions (targets).

246

### 247 **Functional connectivity at a voxelwise level in frontal and temporal cortices**

248 We also performed voxelwise parametric analyses for the frontal and temporal  
249 cortex using the VWFA as the seed. Consistent with the parcel-based analysis, we  
250 found that the voxels connected to the VWFA were most likely located in the expected  
251 language regions in temporal and frontal cortex in both neonates and adults  
252 (Supplementary Figure 4a and 4b). Heatmaps that illustrate the connectivity of  
253 frontotemporal voxels to the VWFA in representative neonates and adults are provided

254 in Supplementary Figure 4c, and a volumetric presentation of average VWFA FC to the  
255 whole-brain in adults and neonates is also provided (Supplementary Figure 5). These  
256 results indicate that voxels connected to the VWFA are located within putative frontal  
257 and temporal language regions in neonates and adults alike.

258

## 259 **Discussion**

260 A mosaic-like functional organization is consistently found in the adult brain.  
261 However, the driving factor of this functional organization and its variation across  
262 individuals remains unclear. The Connectivity Hypothesis proposes that the future  
263 function of a given brain area is largely shaped by how this region connects with the rest  
264 of the brain. Classic studies of ‘rewired’ ferrets showed that the cortical region that  
265 would have developed into A1 took on many of the properties of V1 after retinal input  
266 was rerouted to that location, showing in animal models that connectivity precedes  
267 function<sup>23-27</sup>. Here, we tested the Connectivity Hypothesis in human neonates and  
268 specifically for a high-level visual function that is uniquely human. We asked: is the  
269 putative VWFA already pre-wired at birth to develop differential functional specialization  
270 from its neighbors?

271 The VWFA serves as a good model to study the emergence of functionally selective  
272 regions since this region is highly experience-dependent. We first found higher  
273 connectivity of language regions with the VWFA than with adjacent regions in visual  
274 cortex, and we further replicated previous FC findings in adults<sup>28</sup>, showing higher

275 connectivity of the VWFA with language regions that might be involved in different  
276 aspects of language processing (i.e., lexico-semantic processing, syntactic processing,  
277 structural processing) than with adjacent regions in frontotemporal cortex. Importantly,  
278 we also found that this region already shows adult-like connectivity patterns in  
279 neonates, suggesting that it may be earmarked to become selective to visual words by  
280 showing preferential connectivity with language regions. This research provides the  
281 earliest possible evidence in humans that the cortical tissue that will likely later develop  
282 sensitivity to visual words has a connectivity pattern at birth that makes it a fertile  
283 ground for such development – even before any exposure to words.

284 The organization of visual cortex, including high-level cortex, is largely biased by  
285 retinotopy<sup>8-10</sup>. This retinotopic organization is present very early in development, as  
286 evidenced by previous work, a recent study found that infant macaques, much like  
287 adults, showed a proto-organization for retinotopy throughout the visual system<sup>29</sup>. It is  
288 possible that early genetic instructions and underlying molecular/cytoarchitectonic  
289 determine the retinotopic preferences of neurons within these visual regions, including  
290 in high-level regions. Indeed, it has been posited that the VWFA starts out as part of the  
291 face network, and becomes increasingly selective to words and less selective to faces  
292 in the left hemisphere as literacy is acquired<sup>15, 30</sup>. This hypothesis is attractive because  
293 the perception of both faces and words require high-spatial frequency information that is  
294 represented foveally. Thus, with a retinotopic bias/connectivity from lower-level visual  
295 regions, it may be possible to first differentiate face regions from scene regions (foveal  
296 vs. peripheral bias) early in development (if not at birth), and then face from word  
297 regions after literacy is gained, perhaps through differential connections with fronto-

298 temporal language regions. However, retinotopic organization or connectivity to early  
299 retinotopic cortex alone cannot explain the early differentiation of the VWFA from face  
300 regions, as we found here. We propose that in addition to its predisposition to foveal  
301 stimuli, the location of the future VWFA also depends on its innate connectivity with  
302 language regions even at birth.

303 Numerous open questions remain. First, what are the changes that occur with  
304 reading? In other words, if the VWFA is not selective to words in neonates, how does it  
305 become word-selective with literacy? Our results also suggest that there are certain  
306 differences between neonates and adults, such as overall differences in connectivity  
307 magnitude, strengthening of specific connections (i.e., increased connectivity between  
308 VWFA and frontal language regions in adults), and refinement of connections (i.e.,  
309 decreased connectivity between VWFA and speech, A1 in adults). For example, our  
310 parcel-based analyses show that object regions also have high FC to language regions  
311 in neonates whereas in adults they do not; on a finer grain, our parametric analyses  
312 show that the putative VWFA is in fact differentiated from object regions in their  
313 connectivity to language cortex. Further, we found that the VWFA is also differentiated  
314 from object cortex by their connections to a narrower definition of language regions (i.e.  
315 putative Broca's and Wernicke's areas). These findings suggest that while the VWFA is  
316 already differentiated from face, scene, and to some extent object regions at birth, there  
317 is likely further refinement to fully differentiate orthographic representations from other  
318 objects in visual cortex, in line with e.g. Augustin et al. (2015)<sup>31</sup> and Kubota et al.  
319 (2018)<sup>32</sup>. Experience with spoken and written language will likely strengthen

320 connections with specific aspects of the language circuit and further differentiate this  
321 region's function from its neighbors as an individual gains literacy.

322 Another question that remains unanswered is how the connectivity patterns  
323 themselves arose prenatally and evolutionarily. It is likely that a complex mechanism of  
324 intrinsic properties of cortical regions and early signaling mechanisms set up these  
325 large-scale connections. The VWFA may simply be in a privileged location, due to a  
326 myriad of mechanisms including cellular properties and intrinsic circuitry, in addition to  
327 large-scale connectivity that facilitates its later selectivity. Future studies combining  
328 animal models with studies in other human populations, e.g. premature human infants,  
329 may help further elucidate the evolution of these mechanisms. Moreover, the present  
330 study focused on functional connectivity, which raises another interesting question  
331 about whether there exists innate structural connectivity between the putative VWFA  
332 and language regions at birth and what its developmental trajectory looks like. A recent  
333 study observed white matter (i.e., arcuate fasciculus) alterations in 18 months infants  
334 with familiar risk of developmental dyslexia<sup>33</sup>. A potential future direction in this line of  
335 research is to explore the role of white matter maturation properties (e.g., fiber density  
336 and myelination) in prolonged language development, and examine how their interplay  
337 with functional connectivity and experience. Other open avenues of future research  
338 include looking at effective connectivity to try to tease apart the directionality of  
339 connectivity (which would need to be verified with animal models) as well as graph  
340 theoretical approaches<sup>34</sup> to show similarities or differences in network structure between  
341 neonates and adults.



342 Finally, it remains unknown how laterality arises in the human brain. The questions  
343 and hypotheses of this study pertain to the canonical location of the VWFA within the  
344 context of the ventral visual stream (i.e. with respect to other category-selective  
345 regions), rather than the laterality bias of the VWFA vs. e.g. the FFA. Consistent with  
346 previous studies in adults that compared VWFA connectivity to adjacent regions<sup>16, 28, 35,</sup>  
347 we restricted our analyses to the left hemisphere in order to eliminate potential  
348 confounds of cross-hemispheric differences. The development of functional specificity in  
349 right vs. left visual cortex remains an open question. A longitudinal study that can  
350 functionally define these regions in children (after they can participate in a task-based  
351 fMRI scan) can answer these questions and more, as discussed in the limitations below.

352 There exist certain limitations in the current study. We found evidence in favor of the  
353 Connectivity Hypothesis; stronger causal evidence would involve experimental  
354 manipulations of connectivity patterns to test if functional specialization changes as a  
355 consequence of these connectivity changes. However, this type of study would be  
356 invasive in newborn humans; here we attempt to leverage experience-dependent  
357 domains and a study of neonates to test the Connectivity Hypothesis but acknowledge  
358 the limitations of causal inferences that can be drawn from noninvasive studies. Further,  
359 a challenge of studying the functional organization of the neonatal brain is that there is  
360 no adequate way to localize functional responses using fMRI in neonates. Here we  
361 used functional parcels from previous studies and overlaid these parcels onto both adult  
362 and neonate brains. These parcels likely encompass the functional regions in individual  
363 subjects which offer better functional relevance than anatomical landmarks, but as a  
364 consequence, also likely overestimate the size of the functional regions. To further

365 explore spatial specificity, we chose adjacent functional parcels as comparisons,  
366 explored smaller subsets of the language parcels, and performed voxelwise analyses  
367 on individual subject data without predefined functional regions. However, the present  
368 results are still limited by the functional parcels as well as current registration and image  
369 processing methods in neonates; better registration methods such as surface-based  
370 registration to an adult template are currently unavailable in neonates but will likely  
371 improve the results and inferences drawn from these studies. Additionally, future  
372 studies may consider new approaches to localize functional responses in young infants  
373 or longitudinal studies, e.g., Saygin et al. (2016)<sup>18</sup>, to define each of these functional  
374 regions in individual subjects and further test the specificity of the current findings.  
375 Finally, we tested the Connectivity Hypothesis for the VWFA specifically. The findings  
376 suggest that connectivity-based scaffolding may be a general driving mechanism for the  
377 functional organization of human cortex, but the generality of this hypothesis for other  
378 mental domains remains to be tested.

379

## 380 **Online Methods**

### 381 **Participants.**

382 *Neonates.* We used the initial release of the Developing Human Connectome Project  
383 (dHCP) neonatal data (<http://www.developingconnectome.org>)<sup>36</sup>. Neonates were  
384 recruited and imaged at the Evelina Neonatal Imaging Centre, London. Informed  
385 parental consent was obtained for imaging and data release, and the study was

386 approved by the UK Health Research Authority. All 40 neonates of the initial release  
387 were included in functional connectivity analysis and were born and imaged at term age  
388 (15 female, mean gestational age at birth = 38.99 weeks, gestational age range at scan  
389 = 37-44 weeks).

390 *Adults.* Adult data were obtained from the Human Connectome Project (HCP), WU-Minn  
391 HCP 1200 Subjects Data Release ([https://www.humanconnectome.org/study/hcp-](https://www.humanconnectome.org/study/hcp-young-adult)  
392 [young-adult](https://www.humanconnectome.org/study/hcp-young-adult))<sup>37</sup>. All participants were scanned at Washington University in St. Louis  
393 (WashU). 40 adults were included in functional connectivity analysis (15 female, age  
394 range = 22-36 years old). These adult participants were motion and sex matched to the  
395 neonates. Specifically, for each neonatal participant we matched with an adult from the  
396 HCP dataset with the same sex who showed the most similar motion parameter (i.e.,  
397 framewise displacement, FD) with the k-nearest neighbors' approach. By doing this, we  
398 are able to match the sex ratio and no evidence for a statistically difference was found  
399 for head motion between groups ( $t(78) = 0.77$ ,  $p = 0.45$ , Cohen's  $d = 0.17$ , 95% CI = [-  
400 0.02, 0.01]).

401

## 402 **Data acquisition.**

403 *Neonates.*

404 Imaging was carried out on 3T Philips Achieva (running modified R3.2.2 software) using  
405 a dedicated neonatal imaging system which included a neonatal 32 channel phased  
406 array head coil<sup>38</sup>. All neonates were scanned in natural sleep; previous studies have

407 shown that the resting-state FC remains consistent while awake and asleep, as well as  
408 while under anesthesia<sup>39, 40</sup>.

409 **Resting-state fMRI.** High temporal resolution fMRI developed for neonates using  
410 multiband (MB) 9x accelerated echo-planar imaging was collected (TE/TR = 38/392ms,  
411 voxel size = 2.15 × 2.15 × 2.15mm<sup>3</sup>). The duration of resting-state fMRI scanning was  
412 approximately 15 minutes and consisted of 2300 volumes for each run. No in-plane  
413 acceleration or partial Fourier was used. Single-band reference scans were also  
414 acquired with bandwidth matched readout, along with additional spin-echo acquisitions  
415 with both AP/PA fold-over encoding directions.

416 **Anatomical MRI.** High-resolution T2-weighted and inversion recovery T1-weighted  
417 multi-slice fast spin-echo images were acquired with in-plane resolution 0.8 × 0.8mm<sup>2</sup>  
418 and 1.6mm slices overlapped by 0.8mm (T2-weighted: TE/TR = 156/12000ms; T1  
419 weighted: TE/TR/TI = 8.7/4795/1740ms).

420 *Adults.*

421 All the scans of WU-Minn HCP 1200 Subjects Data Release was carried out using a  
422 customized 3T Connectome Scanner adapted from a Siemens Skyra (Siemens AG,  
423 Erlanger, Germany) with 32-channel Siemens receive head coil and a “body”  
424 transmission coil designed by Siemens specifically for the smaller space available using  
425 the special gradients for the WU-Minn and MGH-UCLA Connectome scanners.

426 **Resting-state fMRI.** Participants were scanned using the Gradient-echo EPI sequence  
427 (TE/TR = 33.1/720ms, flip angle = 52°, number of slices = 72, voxel size = 2 × 2 × 2

428 mm<sup>3</sup>). The duration of resting-state fMRI scanning was approximately 15 minutes and  
429 consisted of 1200 volumes for each run. All participants accomplished two resting-state  
430 fMRI sessions. Within each session, there were two phases encoding in a right-to-left  
431 (RL) direction in one run and phase encoding in a left-to-right (LR) direction in the other  
432 run. In current analysis, we used the LR phase encoding from the first session.  
433 Participants were instructed to open their eyes with relaxed fixation on a projected bright  
434 cross-hair on a dark background.

435 **Anatomical MRI.** High-resolution T2-weighted and T1-weighted images were acquired  
436 with isotropic voxel resolution of 0.7mm<sup>3</sup> (T2-weighted 3D T2-SPACE scan: TE/TR =  
437 565/3200ms; T1-weighted 3D MPRAGE: TE/TR/TI = 2.14/2400/1000ms)

438

### 439 **Preprocessing.**

#### 440 *Structural data Preprocessing.*

441 The dHCP data were released as preprocessed data; they used the dHCP structural  
442 minimal preprocessing pipeline<sup>36</sup>, briefly: bias correction, brain extraction using BET  
443 from FSL, and segmentation of the T2w volume using DRAW-EM algorithm<sup>41</sup> which  
444 were developed for neonatal brain segmentation. Gray and white matter masks were  
445 obtained from segmentations using DRAW-EM algorithm provided by dHCP. The HCP  
446 data were released as preprocessed data; they used the HCP structural preprocessing  
447 pipeline<sup>42</sup>, briefly: gradient distortion correction, brain extraction, a bias field correction,  
448 and registration between the T2-weighted scan and T1-weighted scan. Each individual

449 brain was also aligned to common MNI152 template (with 0.7mm isotropic resolution).  
450 Then, the FreeSurfer pipeline (based on FreeSurfer 5.3.0-HCP) was performed to  
451 segment the volume into predefined structures and surface reconstruction.

452 *Functional data Preprocessing.*

453 The pre-processed functional data released by the dHCP had already undergone basic  
454 pre-processing steps (for details see Fitzgibbon et al. (2019)<sup>43</sup>): distortion-correction,  
455 motion correction, 2-stage registration of the MB-EPI functional image to T2 structural  
456 image and also generated a combined transform from MB-EPI to 40-week T2 template,  
457 and ICA denoising using ICA-FIX<sup>44</sup>. The data released by the HCP had already  
458 undergone basic pre-processing steps (for details see Glasser et al. (2013)<sup>42</sup>): removed  
459 spatial distortions, corrected for motion, registered the fMRI data to both structural and  
460 MNI152 template, reduced the bias field, and ICA denoising using ICA-FIX<sup>44</sup>. The HCP  
461 data were registered to each individual's native space using the transformation supplied  
462 by the HCP and the following steps were performed on both the HCP and dHCP data:  
463 applied smoothing (Gaussian filter with the FWHM = 3 mm) within the all gray matter,  
464 and band-pass filter at 0.009-0.08 Hz. As a further denoising step, we used  
465 aCompCor<sup>44</sup> to regress out signals from white matter and cerebrospinal fluid (CSF) to  
466 control physiological noise like respiration and heartbeat as well as non-neuronal  
467 contributions to the resting state signal. All the FC analyses were performed in native  
468 functional space.

469

## 470 **Defining the functional parcels.**

471 The parcels used here were originally created from probabilistic maps of functional  
472 activation across independent groups of participants, and are generated such that they  
473 encapsulate most individuals' functional regions, via the group-constrained subject-  
474 specific method (GSS)<sup>20</sup>. Contrary to traditional group-based methods (e.g., random-  
475 effects analyses) or using anatomical approximations or Talairach coordinates based on  
476 meta analyses, the GSS approach takes individual variability of functional responses  
477 (size, shape, and location) into account, providing the anchor space for functionally  
478 specialized regions that activate systematically across individuals. The present study  
479 especially benefits from this approach due to the study of nonverbal neonates.  
480 Additionally, these GSS studies were chosen particularly because the tasks and fMRI  
481 contrasts that were used to define the functional regions of interest offer better controls  
482 for the domains of interest. All parcels are available online or via contacting the  
483 corresponding author of the cited publications.

484 All parcels were mapped to the FreeSurfer CVS average-35 MNI152 brain (if they were  
485 not already publicly provided in that space) and were subsequently registered to each  
486 individual's brain (see below). Language regions were released by Fedorenko et al. and  
487 were defined by Sentences vs. pronounceable non-word sentences<sup>20</sup> thus controlling for  
488 prosody, low-level auditory features, and speaker identify, and are found to respond  
489 similarly to auditory and visual versions of the stimuli<sup>45, 46</sup>. Temporal regions included:  
490 AntTemp, anterior temporal lobe; MidAntTemp, middle-anterior temporal lobe;  
491 MidPostTemp, middle-posterior temporal lobe; PostTemp, posterior temporal lobe; and

492 AngG, angular gyrus. Frontal regions included: IFG, interior frontal gyrus; and IFGorb,  
493 orbital IFG. To get a narrower definition of language regions, we selected the IFG  
494 language parcel for Broca's area and the MidAntTemp language parcel for Wernike's  
495 area. The speech region was from Basilakos et al. (2018)<sup>47</sup> and the region we used was  
496 in superior temporal gyrus, which was shown to be sensitive to the phonemic structure  
497 of human speech rather than low-level auditory properties or task-difficulty. A1 was  
498 anatomically defined as Heschl's gyrus (superior and transverse temporal cortex from  
499 the FreeSurfer Desikan-Killiany parcellation<sup>48</sup> in CVS average-35 MNI152 space).  
500 Multiple-demand (MD) parcels located in left frontal cortex were obtained from  
501 Fedorenko et al. (2013)<sup>21</sup>, showing activation to hard vs. easy conditions of working  
502 memory tasks<sup>21, 46, 49</sup>. These parcels were in MFGorb, orbital part of the middle frontal  
503 gyrus; Insula; IFGop, opercular part of the inferior frontal gyrus; SMA, supplementary  
504 motor area; and ACC, anterior/mid cingulate cortex. The VWFA, located in left  
505 occipitotemporal cortex, was created from Words vs. line drawings of Objects, from  
506 Saygin et al. (2016)<sup>18</sup>. The other high-level visual parcels were derived from Julian et  
507 al.<sup>22</sup>, and were based on responses to dynamic movie clips<sup>50</sup> and activation for the  
508 contrast of interest. FFA and OFA located in the fusiform and occipital cortex  
509 respectively were identified with faces > objects contrasts<sup>51-53</sup>; scene selective PPA was  
510 identified with scenes > objects contrast<sup>54</sup> and was located in the parahippocampus;  
511 object selective LO and PFS were defined with objects > scrambled objects contrasts<sup>55</sup>  
512 and located in the lateral occipital and posterior fusiform sulcus respectively. Because  
513 both VWFA and language are largely left lateralized<sup>30, 56</sup>, our study includes left  
514 hemisphere seeds and targets only, as was the case with previous studies of these



515 regions<sup>16, 28</sup> as well as a recent study which also looked at VWFA connectivity using the  
516 adult HCP dataset<sup>35</sup>.

517 All functional parcels were placed in the template CVS average-35 MNI152 space,  
518 and were overlaid onto each individual's native anatomical brain using Advanced  
519 Normalization Tools (ANTs version 2.1.0; <http://stnava.github.io/ANTs>)<sup>57-59</sup> for both  
520 adults and neonates. For registration between modalities (i.e., anatomical to native  
521 functional image for neonates), we used nearest neighbor interpolation with Freesurfer's  
522 `mri_vol2vol` function ([https://surfer.nmr.mgh.harvard.edu/fswiki/mri\\_vol2vol](https://surfer.nmr.mgh.harvard.edu/fswiki/mri_vol2vol)). To ensure  
523 no voxel belonged to more than one functional parcel, we assigned any intersecting  
524 voxels of two functional parcels to the one with smaller size as a way to compensate  
525 size differences (e.g., Brissenden et al. 2016<sup>60</sup>). Additionally, voxels within white matter  
526 and cerebellum were also removed. In total, we used 20 non-overlapping functional  
527 parcels from eight categories in the present study.

528

### 529 **Calculating functional connectivity.**

530 The mean timecourse of each functional parcel was computed from the preprocessed  
531 resting state images, and FC was calculated with Pearson's correlation between the  
532 mean timecourse of each seed parcel and each target parcel. To generate normally  
533 distributed values, each FC value was Fisher z-transformed.

534

## 535 **FC fingerprint plots**

536 First, we calculated the average FC from the seed to each of the target categories.  
537 Then we subtracted the mean FC across all categories from each of the averaged FC.  
538 Thus, the value in the fingerprint plots indicates how the seed connects to the targets  
539 compared to the mean connectivity of the seed to all categories (mean-centering)  
540 across subjects in each group. We further quantified the similarity of FC patterns  
541 between adults and neonates. Specifically, for each participant, the Euclidean distance  
542 was calculated between the 4-dimensional FC pattern of the seed (i.e., VWFA or  
543 language regions) and the average FC pattern of others either from the same group or  
544 the different group. This measured how similar each participant was to others.

545

## 546 **Voxel-wise FC analysis in the ventral temporal cortex (VTC) and frontotemporal** 547 **cortex.**

548 We performed a voxel-wise analysis across VTC to get a finer characterization of the  
549 connectivity pattern with language regions. We defined the VTC from the Desikan-  
550 Killiany parcellation<sup>48</sup>, including the fusiform and inferior temporal labels, in FreeSurfer  
551 CVS average-35 MNI152 space, which were registered to each individual's anatomy  
552 and masked with the gray matter image for each individual subject (as provided by the  
553 HCP and dHCP datasets). FC was computed between the mean timecourse of the  
554 language regions and the timecourse of each VTC voxel. Without predefining any  
555 functional parcels within the VTC, this analysis allowed us to characterize where the

556 voxels with highest connectivity were located within the VTC. To quantify this, we  
557 performed a parametric analysis where we increased the threshold of FCs across all  
558 VTC voxels from the 50<sup>th</sup> percentile (median) to the 95<sup>th</sup> and calculated the overlap of  
559 these voxels with each of VTC regions with Dice coefficient. Specifically, each  
560 percentile determines the threshold for binarizing the connectivity data and overlap is  
561 calculated using Dice coefficient for each subject. For example, for the 50<sup>th</sup> percentile  
562 threshold, Dice coefficient was calculated by  $2 * (A \text{ AND } B) / A \text{ OR } B$ , where set A are  
563 the voxels in VTC that are connected to language regions above the 50<sup>th</sup> percentile and  
564 set B are the voxels within the VWFA. We used Matlab to calculate percentiles and Dice  
565 coefficient. The same analysis was performed for frontal cortex and temporal cortex  
566 separately, and frontal and temporal cortex were again defined with Desikan-Killiany  
567 parcellation in the CVS average-35 MNI152 space and masked to only include gray  
568 matter within each subject's individual space). Temporal cortex analyses were restricted  
569 to the more superior regions to prevent overlap with the VTC analysis. Individual subject  
570 results were projected to the surface of each subject using the surfaces provided by the  
571 dHCP and HCP with trilinear interpolation, which takes the average across the surface  
572 normal.

### 573 **Statistics.**

574 2-way mixed design ANOVA were used to test our main focus. Age group (adults,  
575 neonates) was the between-subject variable and target (i.e., different target categories)  
576 was our within-subject variable (i.e., repeated-measures), and thus there was no  
577 experimental group randomization or blinding in the present study. Paired *t*-tests were

578 conducted for within group comparisons and two-tailed *t*-tests for across-group  
579 comparisons. The 95% confidence interval of the mean FC true population difference  
580 was also reported for each *post hoc t*-test. Benjamini & Hochberg/Yekutieli false  
581 discovery rate control (FDR)<sup>61</sup> was used for multiple comparisons correction. Each post  
582 hoc t-test was corrected for the total number of paired-wise comparisons for each  
583 analysis. Data distribution was assumed to be normal, but this was not formally tested.

584 **Data availability.** The data used in this study are publicly available. All relevant  
585 accession codes are publicly available in HCP  
586 (<https://www.humanconnectome.org/study/hcp-young-adult>) and dHCP  
587 (<http://www.developingconnectome.org>).

588 **Code availability.** The code that supports the findings of this study are available from  
589 the corresponding author upon request.

590

## 591 **References**

- 592 1. Deen, B., *et al.* Organization of high-level visual cortex in human infants. *Nat Commun.*  
593 **8**, 13995 (2017).
- 594 2. van den Hurk, J., Van Baelen, M. & de Beeck, H.P.O. Development of visual category  
595 selectivity in ventral visual cortex does not require visual experience. *Proc Natl Acad Sci USA.*  
596 **114**, E4501-E4510 (2017).
- 597 3. Dehaene-Lambertz, G., Dehaene, S. & Hertz-Pannier, L. Functional neuroimaging of  
598 speech perception in infants. *Science.* **298**, 2013-2015 (2002).
- 599 4. Srihasam, K., Vincent, J.L. & Livingstone, M.S. Novel domain formation reveals proto-  
600 architecture in inferotemporal cortex. *Nat. Neurosci.* **17**, 1776 (2014).
- 601 5. Grill-Spector, K., Kourtzi, Z. & Kanwisher, N. The lateral occipital complex and its role in  
602 object recognition. *Vision research.* **41**, 1409-1422 (2001).

- 603 6. Dehaene, S. & Cohen, L. The unique role of the visual word form area in reading. *Trends*  
604 *Cogn Sci.* **15**, 254-262 (2011).
- 605 7. Dehaene, S. & Cohen, L. Cultural recycling of cortical maps. *Neuron.* **56**, 384-398 (2007).
- 606 8. Hasson, U., Levy, I., Behrmann, M., Hendler, T. & Malach, R. Eccentricity bias as an  
607 organizing principle for human high-order object areas. *Neuron.* **34**, 479-490 (2002).
- 608 9. Malach, R., Levy, I. & Hasson, U. The topography of high-order human object areas.  
609 *Trends Cogn. Sci.* **6**, 176-184 (2002).
- 610 10. Gomez, J., Barnett, M. & Grill-Spector, K.J.N.h.b. Extensive childhood experience with  
611 Pokémon suggests eccentricity drives organization of visual cortex. *Nat. Hum. Behav.* **3**, 611-  
612 624 (2019).
- 613 11. Osher, D.E., *et al.* Structural connectivity fingerprints predict cortical selectivity for  
614 multiple visual categories across cortex. *Cereb. Cortex.* **26**, 1668-1683 (2015).
- 615 12. Saygin, Z.M., *et al.* Anatomical connectivity patterns predict face selectivity in the  
616 fusiform gyrus. *Nat. Neurosci.* **15**, 321 (2012).
- 617 13. Barttfeld, P., *et al.* A lateral-to-mesial organization of human ventral visual cortex at  
618 birth. *Brain Structure and Function.* **223**, 3107-3119 (2018).
- 619 14. Baker, C.I., *et al.* Visual word processing and experiential origins of functional selectivity  
620 in human extrastriate cortex. *Proc Natl Acad Sci U S A.* **104**, 9087-9092 (2007).
- 621 15. Dehaene, S., *et al.* How learning to read changes the cortical networks for vision and  
622 language. *Science.* **330**, 1359-1364 (2010).
- 623 16. Bouhali, F., *et al.* Anatomical connections of the visual word form area. *J Neurosci.* **34**,  
624 15402-15414 (2014).
- 625 17. Yeatman, J.D., Rauschecker, A.M. & Wandell, B.A. Anatomy of the visual word form  
626 area: adjacent cortical circuits and long-range white matter connections. *Brain Lang.* **125**, 146-  
627 155 (2013).
- 628 18. Epelbaum, S., *et al.* Pure alexia as a disconnection syndrome: new diffusion imaging  
629 evidence for an old concept. *Cortex.* **44**, 962-974 (2008).
- 630 19. Saygin, Z.M., *et al.* Connectivity precedes function in the development of the visual word  
631 form area. *Nat. Neurosci.* **19**, 1250 (2016).
- 632 20. Fedorenko, E., Hsieh, P.-J., Nieto-Castañón, A., Whitfield-Gabrieli, S. & Kanwisher, N.  
633 New method for fMRI investigations of language: defining ROIs functionally in individual  
634 subjects. *J. Neurophysiol.* **104**, 1177-1194 (2010).
- 635 21. Fedorenko, E., Duncan, J. & Kanwisher, N. Broad domain generality in focal regions of  
636 frontal and parietal cortex. *Proc Natl Acad Sci USA.* **110**, 16616-16621 (2013).
- 637 22. Julian, J.B., Fedorenko, E., Webster, J. & Kanwisher, N. An algorithmic method for  
638 functionally defining regions of interest in the ventral visual pathway. *Neuroimage.* **60**, 2357-  
639 2364 (2012).
- 640 23. Sur, M., Garraghty, P.E. & Roe, A.W. Experimentally induced visual projections into  
641 auditory thalamus and cortex. *Science.* **242**, 1437-1441 (1988).
- 642 24. Roe, A.W., Pallas, S.L., Hahm, J.-O. & Sur, M. A map of visual space induced in primary  
643 auditory cortex. *Science.* **250**, 818-820 (1990).
- 644 25. Roe, A.W., Pallas, S.L., Kwon, Y.H. & Sur, M. Visual projections routed to the auditory  
645 pathway in ferrets: receptive fields of visual neurons in primary auditory cortex. *J Neurosci.* **12**,  
646 3651-3664 (1992).

- 647 26. Sharma, J., Angelucci, A. & Sur, M. Induction of visual orientation modules in auditory  
648 cortex. *Nature*. **404**, 841 (2000).
- 649 27. Horng, S., *et al.* Differential gene expression in the developing lateral geniculate nucleus  
650 and medial geniculate nucleus reveals novel roles for Zic4 and Foxp2 in visual and auditory  
651 pathway development. *J Neurosci*. **29**, 13672-13683 (2009).
- 652 28. Stevens, W.D., Kravitz, D.J., Peng, C.S., Tessler, M.H. & Martin, A. Privileged functional  
653 connectivity between the visual word form area and the language system. *J Neurosci*. **37**, 5288-  
654 5297 (2017).
- 655 29. Arcaro, M.J. & Livingstone, M.S. A hierarchical, retinotopic proto-organization of the  
656 primate visual system at birth. *Elife*. **6**, e26196 (2017).
- 657 30. Dundas, E.M., Plaut, D.C. & Behrmann, M. The joint development of hemispheric  
658 lateralization for words and faces. *J Exp Psychol Gen*. **142**, 348-358 (2013).
- 659 31. Augustine, E., Jones, S.S., Smith, L.B. & Longfield, E. Relations among early object  
660 recognition skills: objects and letters. *Journal of Cognition and Development*. **16**, 221-235  
661 (2015).
- 662 32. Kubota, E.C., Joo, S.J., Huber, E. & Yeatman, J.D. Word selectivity in high-level visual  
663 cortex and reading skill. *Dev Cogn Neurosci*. (2018).
- 664 33. Langer, N., *et al.* White matter alterations in infants at risk for developmental dyslexia.  
665 *Cereb. Cortex*. **27**, 1027-1036 (2017).
- 666 34. Arslan, S., Parisot, S. & Rueckert, D. Joint spectral decomposition for the parcellation of  
667 the human cerebral cortex using resting-state fMRI. in *International Conference on Information*  
668 *Processing in Medical Imaging* 85-97 (Springer, 2015).
- 669 35. Chen, L., *et al.* The visual word form area (VWFA) is part of both language and attention  
670 circuitry. *Nat Commun*. **10**, 1-12 (2019).
- 671 36. Makropoulos, A., *et al.* The developing human connectome project: A minimal  
672 processing pipeline for neonatal cortical surface reconstruction. *Neuroimage*. **173**, 88-112  
673 (2018).
- 674 37. Van Essen, D.C., *et al.* The WU-Minn human connectome project: an overview.  
675 *Neuroimage*. **80**, 62-79 (2013).
- 676 38. Hughes, E.J., *et al.* A dedicated neonatal brain imaging system. *Magn Reson Med*. **78**,  
677 794-804 (2017).
- 678 39. Liu, X., Yanagawa, T., Leopold, D.A., Fujii, N. & Duyn, J.H. Robust long-range coordination  
679 of spontaneous neural activity in waking, sleep and anesthesia. *Cereb. Cortex*. **25**, 2929-2938  
680 (2015).
- 681 40. Larson-Prior, L.J., *et al.* Cortical network functional connectivity in the descent to sleep.  
682 *Proc Natl Acad Sci USA*. **106**, 4489-4494 (2009).
- 683 41. Makropoulos, A., *et al.* Automatic whole brain MRI segmentation of the developing  
684 neonatal brain. *IEEE transactions on medical imaging*. **33**, 1818-1831 (2014).
- 685 42. Glasser, M.F., *et al.* The minimal preprocessing pipelines for the Human Connectome  
686 Project. *Neuroimage*. **80**, 105-124 (2013).
- 687 43. Fitzgibbon, S.P., *et al.* The developing Human Connectome Project (dHCP) automated  
688 resting-state functional processing framework for newborn infants. *BioRxiv*. 766030 (2019).

- 689 44. Salimi-Khorshidi, G., *et al.* Automatic denoising of functional MRI data: combining  
690 independent component analysis and hierarchical fusion of classifiers. *Neuroimage*. **90**, 449-  
691 468 (2014).
- 692 45. Scott, T.L., Gallée, J. & Fedorenko, E. A new fun and robust version of an fMRI localizer  
693 for the frontotemporal language system. *J Cogn Neurosci*. **8**, 167-176 (2017).
- 694 46. Fedorenko, E. The role of domain-general cognitive control in language comprehension.  
695 *Front. Psychol*. **5**, 335 (2014).
- 696 47. Basilakos, A., Smith, K.G., Fillmore, P., Fridriksson, J. & Fedorenko, E.J.C.C. Functional  
697 characterization of the human speech articulation network. *Cereb. Cortex*. **28**, 1816-1830  
698 (2018).
- 699 48. Desikan, R.S., *et al.* An automated labeling system for subdividing the human cerebral  
700 cortex on MRI scans into gyral based regions of interest. *Neuroimage*. **31**, 968-980 (2006).
- 701 49. Blank, I., Kanwisher, N. & Fedorenko, E. A functional dissociation between language and  
702 multiple-demand systems revealed in patterns of BOLD signal fluctuations. *J. Neurophysiol*.  
703 **112**, 1105-1118 (2014).
- 704 50. Pitcher, D., Dilks, D.D., Saxe, R.R., Triantafyllou, C. & Kanwisher, N. Differential selectivity  
705 for dynamic versus static information in face-selective cortical regions. *Neuroimage*. **56**, 2356-  
706 2363 (2011).
- 707 51. McCarthy, G., Puce, A., Gore, J.C. & Allison, T. Face-specific processing in the human  
708 fusiform gyrus. *J Cogn Neurosci*. **9**, 605-610 (1997).
- 709 52. Gauthier, I., *et al.* The fusiform “face area” is part of a network that processes faces at  
710 the individual level. *J Cogn Neurosci*. **12**, 495-504 (2000).
- 711 53. Kanwisher, N., McDermott, J. & Chun, M.M. The fusiform face area: a module in human  
712 extrastriate cortex specialized for face perception. *J Neurosci*. **17**, 4302-4311 (1997).
- 713 54. Epstein, R. & Kanwisher, N. A cortical representation of the local visual environment.  
714 *Nature*. **392**, 598-601 (1998).
- 715 55. Grill-Spector, K., *et al.* Differential processing of objects under various viewing  
716 conditions in the human lateral occipital complex. *Neuron*. **24**, 187-203 (1999).
- 717 56. Frost, J.A., *et al.* Language processing is strongly left lateralized in both sexes: Evidence  
718 from functional MRI. *Brain*. **122**, 199-208 (1999).
- 719 57. Wang, H. & Yushkevich, P. Multi-atlas segmentation with joint label fusion and  
720 corrective learning—an open source implementation. *Front Neuroinform*. **7**, 27 (2013).
- 721 58. Menze, B.H., *et al.* The multimodal brain tumor image segmentation benchmark  
722 (BRATS). *IEEE Trans Med Imaging*. **34**, 1993-2024 (2014).
- 723 59. Avants, B.B., *et al.* The Insight ToolKit image registration framework. *Front Neuroinform*.  
724 **8**, 44 (2014).
- 725 60. Brissenden, J.A., Levin, E.J., Osher, D.E., Halko, M.A. & Somers, D.C. Functional evidence  
726 for a cerebellar node of the dorsal attention network. *J Neurosci*. **36**, 6083-6096 (2016).
- 727 61. Benjamini, Y. & Yekutieli, D. False discovery rate—adjusted multiple confidence intervals  
728 for selected parameters. *Journal of the American Statistical Association*. **100**, 71-81 (2005).

729

730



## 731 **Acknowledgements**

732 We would like to thank the Human Connectome Project  
733 (<https://www.humanconnectome.org>) and developing Human Connectome Project  
734 (<http://www.developingconnectome.org>). Analyses were completed using the Ohio  
735 Supercomputer (<https://www.osc.edu>). We would like to thank members of the Saygin  
736 Developmental Cognitive Neuroscience Lab for feedback and comments and for Drs.  
737 Fedorenko and Kanwisher for help with the localizers for the Supplementary Results.  
738 Funding: This research was partly funded by the Alfred P. Sloan Foundation (to Z.M.S)  
739 and Supplementary Results data were partly funded by NICHD/NIH grant  
740 F32HD079169 to Z.M.S. and MINT foundation grant to Kanwisher.

741

## 742 **Author contributions**

743 J.L.: conceptualization, formal analysis, methodology, writing-original draft & editing;  
744 D.E.O. and H.A.H.: methodology, writing-review; Z.M.S conceptualization, supervision,  
745 writing-review & editing.

746

## 747 **Competing interests**

748 The authors declare no competing interests.

749



## 750 Figure Legends

751 **Fig. 1 | FC between language regions (seed) and high-level visual regions**  
752 **(targets).** Seed, language (yellow); targets, VWFA (purple), faces (blue), scenes (olive),  
753 objects (light green). **(a)** Mean FC between language regions and high-level visual  
754 regions in ventral visual stream. Connectivity values were Fisher z transformed.  
755 Individual data points ( $n = 40$  for each age group) were shown for each category. Error  
756 bars denote s.e.m. Horizontal bars reflect significant *post hoc* paired *t*-tests  $p < 0.05$ ,  
757 corrected. **(b)** FC fingerprint of language regions. Connectivity values were mean-  
758 centered and averaged within each of the four categories to plot the relative patterns for  
759 the adult ( $n = 40$ ) and neonate groups ( $n = 40$ ). **(c)** FC pattern dissimilarity for within and  
760 between groups ( $n = 40$  for each age group). Euclidean distance between each  
761 individual and others either from the same group or different group. n.s., non-significant.

762 **Fig. 2 | Voxel-wise analyses within the ventral temporal cortex (VTC) using**  
763 **language regions as the seed. (a)** Heatmaps for voxels with connectivity to language  
764 regions in representative neonates and adults, thresholded at  $z(r)$  greater than 0.1 ( $p <$   
765  $0.001$ ). **(b)** Parametrically increasing the threshold of FC from the median to the 95<sup>th</sup>  
766 percentile within VTC, we quantified how many of these voxels belonged in each  
767 functional region using *Dice coefficient*. Averaged FC (Fisher's z transformed) across  
768 neonates ( $n = 40$ ; 50<sup>th</sup>:  $z(r) = 0.25$ ,  $p < 0.001$ ; 95<sup>th</sup>:  $z(r) = 0.52$ ,  $p < 0.001$ ; Average FC  
769 across adults ( $n = 40$ ; 50<sup>th</sup>:  $z(r) = 0.22$ ,  $p < 0.001$ ; 95<sup>th</sup>:  $z(r) = 0.45$ ,  $p < 0.001$ ). Error  
770 bars denote s.e.m across participants. \* denotes significant paired *t*-test (VWFA vs.  
771 average of other functional regions,  $p < 0.05$ , corrected).

772 **Fig. 3 | FC between VWFA (seed) and non-visual regions (targets).** Seed, VWFA  
773 (purple); targets, language (yellow), speech (light purple), A1 (orange), MD (green). **(a)**  
774 Mean FC between VWFA and regions in temporal and frontal cortices. Connectivity  
775 values were Fisher z transformed. Error bars denote s.e.m. Individual data points ( $n =$   
776  $40$  for each age group) were shown for each category. Horizontal bars reflect significant  
777 *post hoc* paired *t*-tests  $p < 0.05$ , corrected. **(b)**: FC fingerprint of VWFA. Connectivity  
778 values were mean-centered and averaged within each of the four categories to plot the  
779 relative patterns for the adult ( $n = 40$ ) and neonate ( $n = 40$ ) groups. **(c)** FC pattern  
780 dissimilarity for within and between groups ( $n = 40$  for each age group). Euclidean  
781 distance between each individual and others either from the same group or different  
782 group. n.s., non-significant.

783

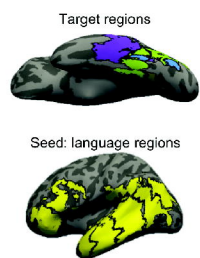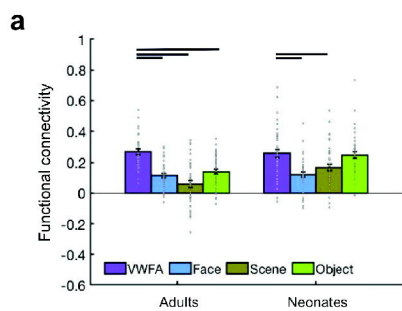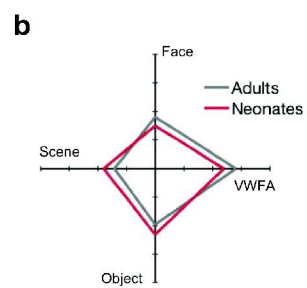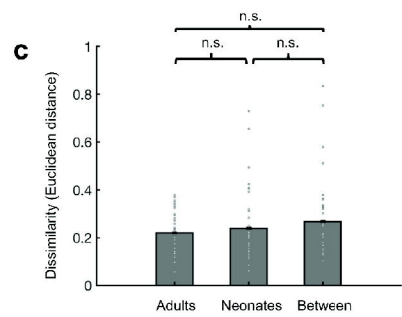



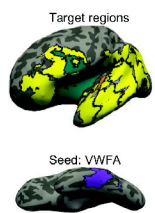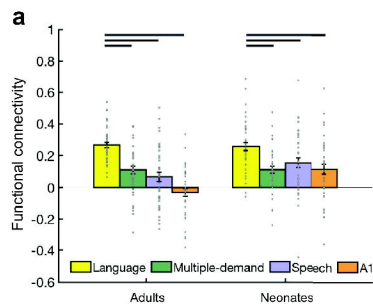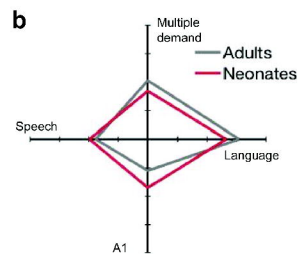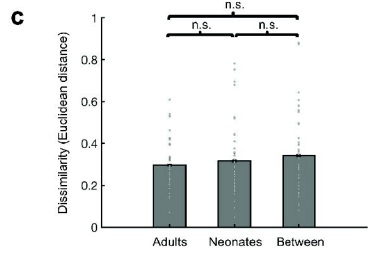

Source: https://www.biorxiv.org/content/10.1101/712455v2.full.pdf
